## REVIEW ARTICLES

# Fruit and Vegetables, and Cardiovascular Disease: A Review

ANDREW R NESS AND JOHN W POWLES

Ness A R (Institute of Public Health, University Forvie Site, Cambridge CB2 2SR, UK) and Powles J W. Fruit and vegetables, and cardiovascular disease: A review. *International Journal of Epidemiology* 1997; **26**: 1–13.

**Background.** Increased interest in the potential cardio-protective effects of fruit and vegetables is currently unsupported by systematic reviews of the reported associations of these foods with risk.

**Method.** All ecological, case-control, cohort studies and unconfounded trials in humans were eligible for inclusion. Eligible outcomes were symptomatic coronary heart disease, stroke and total circulatory disease. Only studies of diet that reported on fresh fruit and vegetables or a nutrient which could serve as a proxy (reversing the usual direction of inference) were included. MEDLINE (1966–1995) and EMBASE (1980–1995) were searched using the terms cerebrovascular disorder, coronary heart disease, fruit(s) and vegetable(s) as keywords. Personal bibliographies, books and reviews were also searched, as were citations in located reports.

**Results.** For coronary heart disease nine of ten ecological studies, two of three case-control studies and six of 16 cohort studies found a significant protective association with consumption of fruit and vegetables or surrogate nutrients. For stroke three of five ecological studies, none (of one) case-control study and six of eight cohort studies found a significant protective association with consumption of fruit and vegetables or surrogate nutrients. For total circulatory disease, one of two cohort studies reported a significant protective association. No attempt was made to arrive at a summary measure of the association because of the differences in study type, study quality and the different exposure measures used.

**Conclusions.** Although null findings may be underreported the results are consistent with a strong protective effect of fruit and vegetables for stroke and a weaker protective effect on coronary heart disease. Greater use of food-based hypotheses and analyses, would complement existing nutrient-based analyses and help guide the search for underlying causes.

**Keywords:** fruit, vegetables, coronary heart disease, stroke, systematic review

Heart attack and stroke are major causes of mortality and morbidity in industrialized countries (outside of East Asia); for example within the UK 26% of deaths in 1992 were attributed to ischaemic heart disease<sup>1</sup> and 12% of deaths to stroke.<sup>2</sup> Diet is believed to be a major factor in the aetiology of cardiovascular disease<sup>3</sup> but there is still considerable scientific uncertainty about the relationship between specific dietary components and cardiovascular disease risk<sup>4</sup> and epidemiological doubts about the adequacy of the classic diet-heart hypothesis.<sup>5</sup>

In contrast to the literature on diet and cancer risk,<sup>6</sup> most studies of cardiovascular disease have reported the associations of risk with nutrients rather than with foods.<sup>3</sup> In retrospect, a more complete understanding of the causal links between diet and vascular disease was assumed than actually existed: recent reports on plasma homocysteine and cardiovascular risk, for example, suggest a newly appreciated connection between fresh foods—as sources of folate—and cardiovascular risk.<sup>7</sup>

Increased interest in putative protective dietary factors in coronary heart disease, such as antioxidants,<sup>8</sup> has generated increased interest in foods which are rich in these substances, such as fruit and vegetables.

Confirmation of the associations between foods and disease risk also provides support for formulating public health messages in terms of foods.

An increase in consumption of fruit and vegetables to 400 g or five portions a day has been advocated by national and international bodies<sup>4,9–11</sup> on the assumption that such a change would reduce the incidence both of cancer and of cardiovascular disease. Systematic reviews of the association between the consumption of fresh fruit and vegetables and the risk of heart attack and stroke are however lacking. This contribution aims to fill that gap.

## METHOD

We sought to include all relevant reports (including abstracts) of ecological, case-control, cohort studies and trials in humans. Eligible outcomes were symptomatic ischaemic heart disease, cerebrovascular disease and

---

Institute of Public Health, University Forvie Site, Cambridge CB2 2SR, UK

total circulatory disease. We excluded studies of peripheral vascular disease, all-cause mortality or cardiovascular risk factors.

We included only studies that measured diet as such and not those that relied on biological markers and intermediate variables. We included studies of vegetarians that measured food intake but excluded those that merely classified people according to whether they ate meat or not. We have focused on studies that reported associations of risk with foods though, for completeness, we have included studies reporting certain nutrient associations where these were highly suggestive of associations with foods. Nutrients included on this basis were vitamin C (from diet as opposed to supplements),  $\beta$ -carotene, folate, flavonoids, potassium and dietary fibre from vegetables. The nutrient categories vegetable protein, the percentage of fats from fruit and vegetables, other carbohydrates (excluding starch and refined sucrose composed mainly of monosaccharides and disaccharides) and dietary fibre were not included. We included ecological studies only where there was explicit comparison with disease rates between populations and where more than two populations were compared.

We searched MEDLINE (1966–1995) using the keyword search terms ‘cerebrovascular disorder’ and ‘coronary heart disease’, as exploded terms, and fruit and vegetable, as both single and plural text words. We searched EMBASE (1980–1995) using the search terms cerebrovascular and coronary and fruit and vegetable, as both single and plural text words. We complemented this computer search with a search of personal bibliographic files, books and reviews<sup>3,6,12–16</sup> and followed up citations in references already located. We continued this process of cross-referencing until no new references were identified.

## RESULTS

We identified ten ecological studies, three case-control studies and 16 cohort studies that reported the relationship between intake of fruit and vegetables and coronary heart disease. The methods and results of these studies are summarized in Tables 1–3.

We identified five ecological studies, one case-control study and eight prospective studies that reported the relationship between intake of fruit and vegetables and stroke. The methods and results of these studies are summarized in Tables 4–6.

We identified two prospective studies that reported the relationship between intake of fruit and vegetables and total circulatory disease. The methods and results of these studies are summarized in Table 7.

We made no attempt to arrive at a summary statistic for the association between the intake of fresh fruit and vegetables and cardiovascular disease as the measures of exposure and disease varied considerably between studies. We have, however, produced two summary tables, Table 8 (coronary heart disease) and Table 9 (stroke).

The presentation of risk in the Tables is standardized—higher number quartiles represent higher intake and the highest quartiles are compared with the lowest. This is denoted as Q5/1 for quintiles, Q4/1 for quartiles and T3/1 for tertiles.

## DISCUSSION

We found nine of 10 ecological studies, two of three case-control studies and six of 16 cohort studies to report a significant protective association of consumption of fruit and vegetables or surrogate nutrients with coronary heart disease. We found no trials that just gave advice to eat more fruit and vegetables. But three trials of dietary advice,<sup>55–57</sup> which included advice to eat more fresh fruit and vegetables and were unconfounded by other lifestyle interventions, reported a survival benefit and are thus consistent with the observed protective association. We found three of five ecological studies, none of one case-control study and six of eight cohort studies to report a significant protective association of consumption of fruit and vegetables or surrogate nutrients with stroke. We found one of two cohort studies to report a significant protective association for all cardiovascular disease.

The studies included differed in: the type of study, the measurement and reporting of exposure, the period of follow-up and outcome selected. For these reasons no attempt was made to arrive at a summary statistic.

We have attempted to review published reports of associations between fruit and vegetable intake and cardiovascular disease. We made no attempt to search for unpublished studies or analyses and a bias against the publication of null or positive associations is possible. We found a number of cohort studies that measured diet and followed the participants up for cardiovascular disease which have not published data on this relationship. Our search strategy, by using a number of different approaches, allowed cross-checking of sources and thereby made omission of published studies unlikely. Our inclusion and exclusion criteria were clearly specified in advance. If one or two cohort studies for coronary heart disease or stroke have been missed or excluded in error, their findings would be unlikely to materially alter our conclusions.

Exposures have been poorly measured in most studies. The resulting exposure misclassification would

TABLE 1 Ecological studies reporting measures of association between intake of fruit and vegetables and coronary heart disease (CHD)

| Population(s)                                                     | Author and year                                    | Age, sex           | Measure of fruit and vegetables                                                | Potential confounders considered                                                               | Measure of CVD <sup>a</sup>               | Dietary association (values are for r)                                                                                                                                                                                      | Notes                                                                                                    |
|-------------------------------------------------------------------|----------------------------------------------------|--------------------|--------------------------------------------------------------------------------|------------------------------------------------------------------------------------------------|-------------------------------------------|-----------------------------------------------------------------------------------------------------------------------------------------------------------------------------------------------------------------------------|----------------------------------------------------------------------------------------------------------|
| 8 regions of England and Wales 1964–1969                          | Knox E G, 1973 <sup>17</sup>                       | All M + F          | Household survey                                                               | –                                                                                              | CHD (standardized mortality ratio)        | Vitamin C: univariate correlation –0.49                                                                                                                                                                                     | Focus of write up: calcium                                                                               |
| 9 regions of Great Britain 1950–1967<br>30 countries 1968 or 1969 | Armstrong B K <i>et al.</i> , 1975 <sup>18</sup>   | 35–64 M + F        | Food balance and household survey                                              | Other dietary variables                                                                        | Age standardized deaths                   | Univariate correlations in Great Britain fresh green vegetables in men: –0.83 ( $P < 0.05$ ), in women –0.91 ( $P < 0.05$ ). In 30 countries vegetables in men –0.39 ( $P < 0.05$ ) and in women –0.22 (NS). Null for fruit | Flour and coffee most strongly correlated                                                                |
| 19 countries 1960–68                                              | Knox E G <i>et al.</i> , 1977 <sup>19</sup>        | 55–64 (most) M + F | Food balance sheets 1960–1968                                                  | Latitude of the capital city                                                                   | Age specific death rates ICD-8            | Correlation CHD and fruit (non citrus) –0.71; CHD and vegetables –0.64                                                                                                                                                      | Table difficult to interpret. Associations in opposite directions for CHD and stroke for most exposures. |
| 20 countries 1954–1965                                            | Byington R <i>et al.</i> , 1979 <sup>20</sup>      | 35–74 M + F        | Food balance sheets 1954–1965                                                  | –                                                                                              | CHD mortality 1971–1973                   | Univariate fruit and non starchy vegetables 1971 in men –0.50 ( $P < 0.05$ ), in women = –0.23 (NS) Similar for 1973                                                                                                        | Correlations weaker than those for dairy and animal products.                                            |
| 49 regions of Japan 1969–78                                       | Ikeda M <i>et al.</i> , 1986 <sup>21</sup>         | most 20–59 M + F   | 1072 24hr duplicate diet 1977–81 K+ measured by spectrometry                   | Age, sex, season                                                                               | Regional CHD standardized mortality ratio | 27 regions men, 39 regions women IHD <sup>d</sup> men K+: 0.10 (NS) IHD women K+: 0.27 ( $P < 0.05$ )                                                                                                                       | Sampling process not described.                                                                          |
| 22 districts of Scotland                                          | Crombie I K <i>et al.</i> , 1990 <sup>22</sup>     | 40–59 M + F        | FFQ <sup>b</sup> in random sample of 10 359 from 22 local government districts | Age, sex, CHD risk factors, BMI, <sup>c</sup> alcohol, smoking, exercise, other blood measures | CHD (standardized mortality ratio)        | Men univariate correlation: % no fruit: 0.59 ( $P < 0.05$ ) % no green vegetables: 0.50 ( $P < 0.05$ )                                                                                                                      | Multivariate analysis uses vitamin C.                                                                    |
| 40 countries, 1975–1977                                           | Artaud-Wild S M <i>et al.</i> , 1993 <sup>23</sup> | 45–64 M            | Food balance sheets                                                            | Dietary cholesterol, saturated fat                                                             | CHD death rates                           | Women univariate correlation: % no fruit: 0.54 ( $P < 0.05$ ) % no green vegetables: 0.43 ( $P < 0.05$ )                                                                                                                    | Study aimed to explain 'French paradox'.                                                                 |
| 19 countries 1985–1987<br>Longitudinal 1970–1987                  | Bellizzi M C <i>et al.</i> , 1994 <sup>24</sup>    | <65 M              | Food balance sheets                                                            | Latitude                                                                                       | Age standardized mortality rates          | Univariate correlations: folic acid –0.46 ( $P < 0.01$ ); vitamin C –0.19 (NS); K+ –0.05 (NS)                                                                                                                               | Focus of write up: vitamin E. Very low $\alpha$ -tocopherol intakes estimated for Japan.                 |
| 21 countries 1965; 1970; 1980; 1988                               | Criqui M H, Ringel B L, 1994 <sup>25</sup>         | 35–74 M + F        | Food balance sheets                                                            | Age, calories, alcohol, animal fat                                                             | Directly age adjusted mortality rates     | For CHD mortality 1988: vegetables (%kcal) = –0.43 fruit (%kcal) = –0.57                                                                                                                                                    | Focus of write up: alcohol. Inconsistent for fruit and vegetables. Analysis adjusted for energy intake.  |
| 12 Caribbean countries 1984–1988                                  | Sinha D P, 1995 <sup>26</sup>                      | All M + F          | Food balance sheets 1979–1981                                                  | Age                                                                                            | Age adjusted CHD mortality                | Correlation between per capita availability of fruits and vegetables and CHD: –0.46                                                                                                                                         | Calories and CHD = 0.64 Fat and CHD = 0.54                                                               |

<sup>a</sup> Cardiovascular disease.<sup>b</sup> Food frequency questionnaire.<sup>c</sup> Body mass index.<sup>d</sup> Ischaemic heart disease.

cont. overleaf

TABLE 2 Case control studies reporting measures of association between intake of fruit and vegetables and coronary heart disease

| Population      | Author and year                                        | Age, sex          | Cases                                     | Controls                 | Exclusions       | Exposure measure                                                         | Potential confounders considered                                                                  | Association with CVD                                                                                                     | Notes                                                              |
|-----------------|--------------------------------------------------------|-------------------|-------------------------------------------|--------------------------|------------------|--------------------------------------------------------------------------|---------------------------------------------------------------------------------------------------|--------------------------------------------------------------------------------------------------------------------------|--------------------------------------------------------------------|
| Northern Italy  | Gramenzi A <i>et al.</i> , 1990 <sup>27</sup>          | 21–69<br>F        | 287 Acute MI<br>1983–1989                 | 649 hospital<br>controls | Systemic disease | FFQ <sup>a</sup> for 10 food<br>groups per week                          | Age, education, area<br>of residence,<br>smoking, CHD risk<br>factors, foods.                     | Carrots OR = 0.4<br>(<1 vs. >1)<br>Green veg OR = 0.6<br>(<7 vs. >7)<br>Fresh fruit OR = 0.4<br>(<7 vs. >13)             | Crude dietary measure.<br>Models mix social and<br>food variables. |
| Athens, Greece  | Tzonou A<br><i>et al.</i> , 1993 <sup>28</sup>         | All ages<br>M + F | 329 first MI or<br>angiogram<br>1990–1991 | 570 hospital<br>controls | Systemic disease | Vitamin C estimated<br>from 110 item FFQ<br>at interview.                | Calories nutrients                                                                                | No association with<br>vitamin C.                                                                                        | No food based<br>analyses.                                         |
| Sofia, Bulgaria | Georgieva<br>L M <i>et al.</i> ,<br>1995 <sup>29</sup> | 45–70<br>M + F    | 154 admissions<br>cardiology unit         | 155 hospital<br>controls |                  | Interview on ward<br>Frequency of fruit<br>and vegetable<br>consumption. | Sociodemographic,<br>family history,<br>tobacco, alcohol and<br>coffee use, physical<br>activity. | Daily vs. $\leq$ 2 days<br>per week:<br>fruit OR = 0.33<br>(CI : 0.17–0.64);<br>vegetables OR = 0.44<br>(CI : 0.21–0.81) | Crude measure of<br>intake.                                        |

<sup>a</sup> Food frequency questionnaire.

TABLE 3 Prospective studies reporting measures of association between intake of fruit and vegetables and coronary heart disease (CHD)

| Population/location                    | Author and year                                 | No.     | Age, sex    | Eligible, recruitment period                      | Exclusions                                              | Exposure measure                                 | Potential confounders considered                                                  | Follow up: duration, completeness | Case identification                      | Number of events                                     | Association with CVD                                           | Notes                                                                                                    |
|----------------------------------------|-------------------------------------------------|---------|-------------|---------------------------------------------------|---------------------------------------------------------|--------------------------------------------------|-----------------------------------------------------------------------------------|-----------------------------------|------------------------------------------|------------------------------------------------------|----------------------------------------------------------------|----------------------------------------------------------------------------------------------------------|
| Bank and bus workers, England          | Morris J N <i>et al.</i> , 1977 <sup>30</sup>   | 337     | 30-67 M     | Healthy middle aged men 1956-1966                 | CHD, prescribed diet                                    | 7 day weighed diary                              | Age, occupation, follow-up                                                        | 10-20 years                       | Survey, letter, employer, record linkage | 45 cases of CHD (26 CHD deaths)                      | No association with fibre from fruit, nuts, pulses, vegetables | High caloric intake cereal fibre protective.                                                             |
| Norwegian postal survey                | Vollset S E, Bjelke E, 1983 <sup>31</sup>       | 16 713  | 45-74 M + F | Response postal survey in 1967 three sub cohorts  | No dietary information                                  | Postal dietary survey                            | Age, sex, region, urbanization                                                    | 11.5 years                        | Record linkage                           | 438 deaths                                           | No association between vitamin C and CHD.                      | Actual strength of association not reported.                                                             |
| Japanese                               | Hirayama T, 1986 <sup>32</sup>                  | 265 118 | 40 + M + F  | Census-based cohort 1965                          | -                                                       | Measurement tool not well described              | Age, smoking, alcohol, meat                                                       | 16 years                          | Record linkage                           | Deaths—numbers not given                             | Green and yellow vegetables daily vs. not: no association      | Crude diet measure.                                                                                      |
| Women in Gothenburg, Sweden            | Lapidus L <i>et al.</i> , 1986 <sup>33</sup>    | 1462    | 38-60 F     | Women in Gothenburg 1968-1969                     | CHD, refusal, unsatisfactory interview                  | 24 hr recall                                     | Age, obesity, CHD risk factors, exercise                                          | 12 years 99.7%                    | Re exams, letter, phone                  | 23 MI (8 fatal; 15 non fatal) 75 deaths              | No association between vitamin C and MI                        | Energy negatively associated with MI.                                                                    |
| Southern California                    | Khaw K-T <i>et al.</i> , 1987 <sup>34</sup>     | 859     | 50-79 M + F | Residents of Rancho Bernardo, 1972-1974           | MI, <sup>a</sup> CVA, <sup>b</sup> heart failure        | 24 hr recall                                     | Age, sex, obesity, CHD risk factors, calories, nutrients                          | 12 years 99.8%                    | Death certificates, questionnaire        | 65 CHD deaths 2.6 non fatal MI                       | K+ protective on univariate analysis but not significant       | Calories, dietary fibre protective.                                                                      |
| Seventh Day Adventists, California     | Fraser G E <i>et al.</i> , 1992 <sup>35</sup>   | 26 473  | 25 + M + F  | Adventists in California 1976                     | CHD, diabetes, Hispanic, non white                      | 65 item FFQ <sup>d</sup>                         | Age, sex, smoking, exercise, BMI, <sup>e</sup> BP, <sup>f</sup> vegetarian, bread | 6 years 97%                       | Questionnaire, hospital notes            | 134 MI definite, 260 definite CHD deaths             | No association with risk for fruit index or legumes            | Low risk cohort. High fruit intake not well discriminated.                                               |
| Nurses, USA                            | Manson J E <i>et al.</i> , 1992 <sup>36</sup>   | 87 245  | 34-59 F     | Examined in 1980                                  | CHD, cancer                                             | FFQ                                              | Age, CHD risk factors, vitamin supplements                                        | 8 years                           | Biennial questionnaire                   | 437 non fatal MI; 115 CHD deaths                     | Adjusted RR Q5/1 for vitamin C: 0.80 (CI : 0.58-1.10)          | Only reported as abstract.                                                                               |
| Caerphilly, Wales                      | Fehily A M <i>et al.</i> , 1993 <sup>37</sup>   | 2512    | 45-59 M     | Male residents in Caerphilly and five villages    | -                                                       | FFQ                                              | Age, BMI, smoking, CHD, calories, nutrients                                       | 5 years 99.7%                     | Re exam 5 yrs                            | 148 CHD events, 132 deaths                           | Adjusted RR Q5/1 vitamin C: 0.63 (NS)                          | 25% had IHD <sup>a</sup> at baseline.                                                                    |
| Health professionals, USA              | Rimm E B <i>et al.</i> , 1993 <sup>38</sup>     | 39 910  | 40-75 M     | Health professionals recruited 1986               | CVD; <sup>c</sup> diabetes ↑cholesterol, poor diet data | FFQ 131 item                                     | Age, smoking, diet, aspirin, exercise                                             | 4 years 96%                       | Biennial questionnaire                   | 667 CHD, 360 CABG, <sup>g</sup> 201 MI, 106 fatal MI | Vitamin C no association, β-carotene reduced risk in smokers   | Main finding was for vitamin E. High vitamin C ranges.                                                   |
| -                                      | Rimm E B <i>et al.</i> , 1995 <sup>39</sup>     | 43 757  | -           | -                                                 | -                                                       | -                                                | Age, saturated fat, vitamin E                                                     | 6 years                           | -                                        | 229 fatal MI, 505 non fatal MI                       | Age adjusted RR total fibre Q5/1 (CI : 0.46-0.76)              | Abstract report. 'No single fibre source ... more protective.'                                           |
| Residents of Zutphen, East Netherlands | Hertog M G L <i>et al.</i> , 1993 <sup>40</sup> | 805     | 65-84 M     | Survivors of 1960 cohort and new recruits in 1985 | -                                                       | Cross-check diet history method (1 hr interview) | Age, BMI, exercise, CHD risk factors, nutrients, calories                         | 5 years 100%                      | 5 yr re-exam, municipality registers     | 38 cases of MI (13 fatal), 43 CHD deaths             | RR CHD death apples (g/d) tertiles T3/1 0.51 (NS)              | Main focus of report: flavonoids-protective association. Tertiles of apple intake g/day T3/1: ≥ 110/<18. |

Cont. overleaf

TABLE 3 (cont.)

| Population/<br>location                 | Author and<br>year                                | No.    | Age,<br>sex     | Eligible,<br>recruitment<br>period                                  | Exclusions                                                                 | Exposure measure                          | Potential<br>confounders<br>considered                                                                                                                                               | Follow up:<br>duration,<br>completeness | Case<br>identification                                                           | Number of<br>events                      | Association with<br>CVD                                                                                                                                               | Notes                                                                                                                                                                          |
|-----------------------------------------|---------------------------------------------------|--------|-----------------|---------------------------------------------------------------------|----------------------------------------------------------------------------|-------------------------------------------|--------------------------------------------------------------------------------------------------------------------------------------------------------------------------------------|-----------------------------------------|----------------------------------------------------------------------------------|------------------------------------------|-----------------------------------------------------------------------------------------------------------------------------------------------------------------------|--------------------------------------------------------------------------------------------------------------------------------------------------------------------------------|
| Several<br>regions of<br>Finland        | Knekt P<br><i>et al.</i> , 1994 <sup>41</sup>     | 5133   | 30-69<br>M + F  | Finnish regions<br>1966-1972                                        | CHD                                                                        | Diet history<br>method                    | Age, sex, smoking,<br>CHD risk factors,<br>obesity, calories                                                                                                                         | 14 years                                | Record linkage                                                                   | 244 CHD deaths<br>(186 men,<br>58 women) | RR T3/1 men for<br>vegetables<br>0.66 ( $P = 0.02$ ),<br>T3/1 men for fruit:<br>0.77 ( $P = 0.28$ )<br>Women similar<br>and $>1.59 \leq 75$ in<br>women.              | Focus of write up:<br>antioxidants.<br><br>Vegetable and fruit<br>intake g/day T3/1<br>$>117 \leq 61$ in men<br>and $>159 \leq 75$ in<br>women.                                |
| -                                       | Knekt P<br><i>et al.</i> , 1996 <sup>42</sup>     | -      | -               | -                                                                   | -                                                                          | -                                         | -                                                                                                                                                                                    | 26 years                                | -                                                                                | 473 CHD deaths                           | Protective<br>association Q4/1 RR<br>between 0.50-0.89<br>for apples, berries<br>(only in women),<br>$\geq 458$ vs. $<262$ ,<br>other fruit, onions<br>and vegetables | Focus of write up:<br>flavonoids.<br><br>Vegetable intake<br>Q4/1 (g/day) in men<br>$\geq 458$ vs. $<262$ ,<br>?includes potatoes).<br>Cause of death not<br>confirmed in 15%. |
| Elderly<br>Massachusetts<br>residents   | Gaziano J M<br><i>et al.</i> , 1995 <sup>43</sup> | 1299   | $> 66$<br>M + F | State-wide area<br>sample 1976                                      | Living in a<br>nursing home                                                | 43 category FFQ                           | Age, sex, smoking,<br>cholesterol intake,<br>alcohol, activities of<br>daily living                                                                                                  | 4.75 years<br>96% f/u                   | Mailings,<br>interview                                                           | 48 fatal MI                              | Adjusted RR for<br>$\beta$ -carotene Q4/1:<br>0.27 ( $P = 0.005$ )                                                                                                    | Low vitamin C<br>intake and infrequent<br>supplement use. No<br>food based analyses.                                                                                           |
| Elderly,<br>eight areas<br>of Britain   | Gale C R<br><i>et al.</i> , 1995 <sup>44</sup>    | 730    | 65 +<br>M + F   | Elderly living in<br>the community<br>1973-1974                     | CVD, no diet<br>data                                                       | 7 day weighed<br>record                   | Age, sex, CHD risk<br>factors, social class,<br>nutrients, obesity,<br>smoking                                                                                                       | 20 years<br>93%                         | Record linkage                                                                   | 182 CHD deaths                           | Adjusted RR CHD<br>death, vitamin C<br>T3/1 0.8<br>(CI : 0.6-1.2)                                                                                                     | Potatoes included as<br>fruit and vegetables.                                                                                                                                  |
| Residents in<br>Framingham,<br>USA      | Gillman M W<br><i>et al.</i> , 1995 <sup>45</sup> | 832    | 45-65<br>M      | Framingham men<br>examined 1966-<br>1969                            | CVD                                                                        | 24 hr recall                              | CHD risk factors,<br>left ventricular<br>hypertrophy, BMI,<br>energy, alcohol,<br>exercise                                                                                           | 20 years<br>98%                         | Biennial exam                                                                    | CHD nos. not<br>reported                 | CHD no association                                                                                                                                                    | Poor exposure<br>measure.                                                                                                                                                      |
| Working<br>men in the<br>Chicago area   | Pandey D K<br><i>et al.</i> , 1995 <sup>46</sup>  | 1556   | 40-55<br>M      | Employees for<br>2 years+ Western<br>Electric, Chicago<br>1957-1959 | CHD, cancer,<br>diabetes,<br>missing data                                  | Diet history $\times 2$<br>(1 year apart) | Age, family history,<br>CHD risk factors,<br>smoking, BMI,<br>energy, fats, iron,<br>education, alcohol,<br>cholesterol intake                                                       | 24 years<br>complete                    | Annual exam<br>until 1969, vital<br>status after<br>25 years                     | 231 CHD deaths                           | Adjusted RR for<br>T3/1 in vitamin C +<br>$\beta$ -carotene index<br>0.70 (CI : 0.49-0.98)                                                                            | Few supplement<br>takers.<br><br>T3/1 mg/day<br>vitamin C 138/66,<br>$\beta$ -carotene 5,3/2.3.                                                                                |
| Post-<br>menopausal<br>women in<br>Iowa | Kushi L H<br><i>et al.</i> , 1996 <sup>47</sup>   | 34-486 | 55-69<br>F      | Random sample<br>with valid drivers<br>licence. Mailed<br>in 1986   | Pre menopause,<br>low reported<br>energy intake,<br>CHD, FFQ<br>incomplete | 127 item FFQ                              | Age, energy, BMI,<br>WHR, <sup>f</sup> smoking,<br>hypertension,<br>diabetes, HRT, <sup>g</sup><br>contraceptive use,<br>physical activity,<br>alcohol, marital<br>status, education | 7 years                                 | Iowa death<br>register,<br>biennial<br>questionnaire,<br>national death<br>index | 242 CHD deaths                           | Adjusted RR Q5/1<br>vitamin C food and<br>supplements 1.49<br>(CI : 0.96-2.30)                                                                                        | No analysis for fruits<br>and vegetables.<br><br>Intake of vitamin C<br>from foods and<br>supplements high.<br>Result similar in non<br>supplement takers.                     |

<sup>a</sup> Myocardial infarction.<sup>b</sup> Cerebrovascular accident.<sup>c</sup> Cerebrovascular disease.<sup>d</sup> Food frequency questionnaire.<sup>e</sup> Body mass index.<sup>f</sup> Blood pressure.<sup>g</sup> Coronary artery bypass graft.<sup>h</sup> Ischaemic heart disease.<sup>i</sup> Waist-hip ratio.<sup>j</sup> Hormone replacement therapy.

TABLE 4 Ecological studies reporting measures of association between intake of fruit and vegetables and stroke

| Population(s)                              | Author and year                                    | Age, sex           | Measure of fruit and vegetables                                    | Potential confounders considered | Measure of CVD <sup>a</sup>                             | Effect on CVD (values are for r)                                                                                                                               | Notes                                                                                                                       |
|--------------------------------------------|----------------------------------------------------|--------------------|--------------------------------------------------------------------|----------------------------------|---------------------------------------------------------|----------------------------------------------------------------------------------------------------------------------------------------------------------------|-----------------------------------------------------------------------------------------------------------------------------|
| 8 regions of England and Wales 1964–1969   | Knox E G, 1973 <sup>17</sup>                       | All M + F          | Household survey                                                   | –                                | CVA standardized mortality ratio                        | Vitamin C: –0.68                                                                                                                                               | Focus of write up: calcium                                                                                                  |
| 19 countries 1960–1968                     | Knox E G <i>et al.</i> , 1977 <sup>19</sup>        | 55–64 (most) M + F | Food balance sheets 1960–1968                                      | Latitude of the capital city     | Age specific death rates                                | Non citrus fruit 0.30<br>Vegetables 0.38<br>Potatoes 0.18                                                                                                      | Difficult to interpret.<br>Associations in opposite directions for CHD and stroke for most exposures.                       |
| 16 regions of England, Wales, and Scotland | Acheson R M and Williams D R R, 1983 <sup>48</sup> | 45–64 M + F        | Household survey                                                   | Age, sex                         | CVA death rate 1970–1972                                | Fruit: men –0.67 ( $P = 0.04$ ); women –0.74 ( $P = 0.02$ )<br>Vegetables: men –0.55 ( $P = 0.12$ ); women –0.80 ( $P = 0.01$ )                                | Similar correlations when restricted to England and Wales and for different types of vegetable.                             |
| 49 regions of Japan                        | Ikedo M <i>et al.</i> , 1986 <sup>21</sup>         | most 20–59 M + F   | 1072 24 hr duplicate diets 1977–1981 K+ by spectrometry            | Age, sex, season                 | Regional standardized mortality ratios                  | 27 regions men, 39 regions women<br>CVA men K+: 0.19 (NS)<br>CVA women K+: 0.39 ( $P < 0.01$ )                                                                 | Sampling process not described.                                                                                             |
| 22 districts of Scotland                   | Slarr J M <i>et al.</i> , 1996 <sup>49</sup>       | 40–59 M + F        | FFQ in random sample of 10 359 from 22 local government districts. | Age, sex                         | Age specific hospital admission rates for CVA 1984–1986 | Men % not eating fruit: 0.56 ( $P < 0.01$ )<br>% not eating vegetables: 0.30<br>Women % not eating fruit: 0.47 ( $P < 0.05$ )<br>% not eating vegetables: 0.25 | Multivariate include socioeconomic variables along with risk factors and exposure measures making interpretation difficult. |

<sup>a</sup> For abbreviations see footnote to Table 3.

TABLE 5 Case control studies reporting measures of association between intake of fruit and vegetables and stroke

| Population     | Author and year                            | Age, sex       | Cases                     | Controls                      | Exclusions                                     | Exposure measure                         | Potential confounders considered                                              | Association with CVD <sup>a</sup>    | Notes                                                           |
|----------------|--------------------------------------------|----------------|---------------------------|-------------------------------|------------------------------------------------|------------------------------------------|-------------------------------------------------------------------------------|--------------------------------------|-----------------------------------------------------------------|
| Nottingham, UK | Barer D <i>et al.</i> , 1989 <sup>50</sup> | All ages M + F | 63 thrombotic stroke 1984 | 47 chest pain, 44 acute other | Embolic stroke, CVA, systemic disease, too ill | Questionnaire vitamin C index from foods | Socioeconomic, smoking, alcohol, non steroidal anti-inflammatory drugs, build | No association with vitamin C intake | Hospital cases and controls.<br>Crude measure of habitual diet. |

<sup>a</sup> For abbreviations see footnotes to Table 3.

TABLE 6 Prospective studies reporting measures of association between intake of fruit and vegetables and stroke

| Population/location               | Author and year                                | No.     | Age, sex       | Eligible, recruitment period                        | Exclusions                             | Exposure measure               | Potential confounders considered                                                    | Follow up: duration, completeness | Case identification                            | Number of events                          | Association with CVD <sup>a</sup>                                    | Notes                                                                                    |
|-----------------------------------|------------------------------------------------|---------|----------------|-----------------------------------------------------|----------------------------------------|--------------------------------|-------------------------------------------------------------------------------------|-----------------------------------|------------------------------------------------|-------------------------------------------|----------------------------------------------------------------------|------------------------------------------------------------------------------------------|
| Norwegian postal survey           | Vollset S E, Bjelke E, 1983 <sup>31</sup>      | 16 713  | 45-74<br>M + F | Response postal survey in 1967 three sub cohorts    | No dietary information                 | Postal dietary survey          | Age, sex, region, urbanization                                                      | 11.5 years                        | Record linkage                                 | 438 deaths                                | Vitamin C RR T3/1 CVA death 0.67 (CI : 0.52-0.87)                    | Protective effect potatoes, vegetables, fruits, estimates for other exposures not cited. |
| Japanese                          | Hirayama T, 1986 <sup>32</sup>                 | 265 118 | 40+<br>M + F   | Census based 1965 cohort                            | -                                      | Measurement tool not described | Age, smoking, alcohol, meat                                                         | 16 years                          | Record linkage                                 | Deaths—numbers not given                  | Green and yellow vegetables daily vs. not; no association            | Crude diet measure.                                                                      |
| Women in Gothenburg, Sweden       | Lapidus L <i>et al.</i> , 1986 <sup>33</sup>   | 1462    | 38-60<br>F     | Women in Gothenburg 1968-1969                       | CHD, refusal, unsatisfactory interview | 24 hr recall                   | Age, obesity, CHD risk factors, exercise                                            | 12 years 99.7%                    | Re exams, letter, phone                        | 13 CVA (75 deaths)                        | No association vitamin C and CVA                                     | -                                                                                        |
| Southern California               | Khaw K-T, Barrett-Connor E, 1987 <sup>51</sup> | 859     | 50-79<br>M + F | Residents of Rancho Bernardo, 1972-1974             | MI, CVA, heart failure                 | 24 hr recall                   | Age, sex, obesity, CHD risk factors, calories, nutrients                            | 12 years 99.8%                    | Death certificates, questionnaire              | 24 stroke deaths 17 non fatal strokes     | Adjusted RR CVA death T10 mmol intake ↓40% (P < 0.001)               | Non significant associations with calcium, fibre, magnesium.                             |
| Hawaiian men of Japanese ancestry | Lee C N <i>et al.</i> , 1987 <sup>52</sup>     | 7591    | 45-68<br>M     | Men of Japanese ancestry resident in Oahu 1965-1968 | CVD                                    | 24 hr recall                   | Age, calories, nutrients, glucose, BP, smoking                                      | 16 years                          | Surveillance of hospitals, death registrations | 408 CVA; 254 thrombotic; 111 haemorrhagic | K+, protective for fatal thrombotic CVA. NS for non fatal thrombotic | No association with haemorrhagic CVA.                                                    |
| Nurses, USA                       | Manson J E <i>et al.</i> , 1994 <sup>53</sup>  | 87 245  | 34-59<br>F     | US nurses recruited 1980                            | CVD, cancer                            | FFQ                            | Age, smoking                                                                        | 8 years                           | Biannual questionnaire                         | Incident CVA 345 cases                    | Q5/1 of veg score adjusted 0.74 (P = 0.03)                           | Null for fruit. RR carrots 0.32 RR spinach 0.57 5+/wk vs. <1 mth.                        |
| Elderly, eight areas of Britain   | Gale C R <i>et al.</i> , 1995 <sup>44</sup>    | 730     | 65+<br>M + F   | Elderly in the community 1973-1974                  | CVD, no diet data                      | 7 day weighed diet record      | Age, sex, CHD risk factors, social class, nutrients, obesity, smoking               | 20 years 93%                      | Record linkage                                 | 124 deaths CVA                            | Adjusted RR stroke death and vitamin C T3/1: 0.5 (CI : 0.3-0.8)      | Low vitamin C intake and infrequent supplement use. No food based analysis.              |
| Residents in Framingham USA       | Gillman M W <i>et al.</i> , 1995 <sup>45</sup> | 832     | 45-65<br>M     | Framingham men examined 1966-1969                   | CVD                                    | 24 hr recall                   | CHD risk factors, BMI, exercise, left ventricular hypertrophy, energy, fat, alcohol | 20 years 98%                      | Biennial exam                                  | 73 CVA, 24 TIA <sup>b</sup> 14 deaths CVA | RR per 3 servings/day: 0.78 (CI : 0.62-0.98).                        | Potatoes included as fruit and vegetables. Poor exposure measure.                        |

<sup>a</sup> For abbreviations see footnotes to Table 3.<sup>b</sup> Trans-isaemic attack.



TABLE 7 *Prospective studies reporting measures of association between intake of fruit and vegetables and total circulatory disease*

| Population/<br>location                         | Author and<br>year                                | No.    | Age,<br>sex    | Eligible,<br>recruitment<br>period                 | Exclusions                  | Exposure measure                    | Potential<br>confounders<br>considered                                                          | Follow up:<br>duration,<br>completeness | Case<br>identification                 | Number of<br>events                | Association with<br>CVD <sup>a</sup>                                                             | Notes                                                                                                                                               |
|-------------------------------------------------|---------------------------------------------------|--------|----------------|----------------------------------------------------|-----------------------------|-------------------------------------|-------------------------------------------------------------------------------------------------|-----------------------------------------|----------------------------------------|------------------------------------|--------------------------------------------------------------------------------------------------|-----------------------------------------------------------------------------------------------------------------------------------------------------|
| Representative<br>sample<br>of US<br>population | Enstrom J E<br><i>et al.</i> , 1992 <sup>54</sup> | 11 348 | 25–74<br>M + F | Sample of US<br>civilians<br>1971–1975<br>NHANES I | In institution              | Vitamin C (24 hr<br>recall and FFQ) | Age, sex, smoking,<br>education, race,<br>disease, exercise,<br>alcohol, calories,<br>nutrients | 10 years<br>93%                         | Re interview,<br>death<br>certificates | 1 809 deaths;<br>(929 circulatory) | No association when<br>vitamin C intake of<br><50 mg/d vs.<br>≥50mg/d compared                   | Effect only in<br>supplement group,<br>null for food.                                                                                               |
| Elderly<br>Massachusetts<br>residents           | Gaziano J M<br><i>et al.</i> , 1995 <sup>55</sup> | 1 299  | >66<br>M + F   | State-wide area<br>sample 1976                     | Living in a<br>nursing home | 43 category FFQ                     | Age, sex, smoking,<br>cholesterol intake,<br>alcohol, activities of<br>daily living             | 4.75 years<br>96%                       | Mailing,<br>interview                  | 317 deaths<br>(161 CVD)            | RR ≥ 1/day vs.<br><1/day<br>carrots 0.40<br>(CI : 0.17–0.98)<br>salads 0.49<br>(CI : 0.31–0.71). | Cause of death not<br>confirmed in 15%.<br>Broccoli 0.29 (NS)<br>tomatoes 0.73 (NS)<br>strawberries/melon<br>0.70 (NS)<br>dried fruit<br>1.13 (NS). |

<sup>a</sup> For abbreviations see footnote to Table 3.

TABLE 8 Summary of studies reporting measures of association between intake of fruit and vegetables and coronary heart disease

| Study type                     | Study population(s)                                    | Association with food | Association with proxy <sup>b</sup> |
|--------------------------------|--------------------------------------------------------|-----------------------|-------------------------------------|
| Ecological                     | 8 regions of England and Wales <sup>17</sup>           | –                     | neg <sup>a</sup>                    |
|                                | 30 countries and Great Britain over time <sup>18</sup> | neg                   | –                                   |
|                                | 19 countries <sup>19</sup>                             | neg                   | –                                   |
|                                | 20 countries <sup>20</sup>                             | neg                   | –                                   |
|                                | 49 regions of Japan <sup>21</sup>                      | –                     | pos                                 |
|                                | 22 districts of Scotland <sup>22</sup>                 | neg                   | –                                   |
|                                | 40 countries and each country over time <sup>23</sup>  | –                     | neg                                 |
|                                | 19 countries <sup>24</sup>                             | neg                   | –                                   |
|                                | 21 countries <sup>25</sup>                             | neg                   | –                                   |
|                                | 12 Caribbean countries <sup>26</sup>                   | neg                   | –                                   |
| Case control                   | Italian women <sup>27</sup>                            | neg                   | –                                   |
|                                | Greece <sup>28</sup>                                   | –                     | null                                |
|                                | Bulgaria <sup>29</sup>                                 | neg                   | –                                   |
| Cohort                         | London bus and bank workers <sup>30</sup>              | –                     | null                                |
|                                | Norwegian postal survey <sup>31</sup>                  | –                     | null                                |
|                                | Japanese general population <sup>32</sup>              | null                  | –                                   |
|                                | Gothenburg women <sup>33</sup>                         | –                     | null                                |
|                                | Rancho Bernardo <sup>34</sup>                          | –                     | null                                |
|                                | Seventh Day Adventists <sup>35</sup>                   | null                  | –                                   |
|                                | US nurses <sup>36</sup>                                | –                     | neg                                 |
|                                | Caerphilly <sup>37</sup>                               | –                     | null                                |
|                                | US Health professionals <sup>38,39</sup>               | –                     | neg                                 |
|                                | Zutphen <sup>40</sup>                                  | –                     | neg                                 |
|                                | Finnish regions <sup>41,42</sup>                       | neg                   | –                                   |
|                                | Boston elderly <sup>43</sup>                           | –                     | neg                                 |
|                                | UK elderly <sup>44</sup>                               | –                     | null                                |
|                                | Framingham <sup>45</sup>                               | null                  | –                                   |
| Western Electric <sup>46</sup> | –                                                      | neg                   |                                     |
| Iowa women <sup>47</sup>       | –                                                      | null                  |                                     |

<sup>a</sup> Association neg = statistically significant negative association, pos = statistically significant positive association and null = no significant association. A negative association implies a protective effect.

<sup>b</sup> Proxy indicates that associations were only reported for nutrients – taken here as proxies for fruit and vegetables.

be unlikely to produce spurious significant associations but may have obscured important underlying associations. We chose to include surrogate or proxy nutrients where no food based analyses were presented. This approach was necessitated by the large number of studies that framed their hypotheses in terms of nutrients and reported only on associations with nutrients. We accept that these surrogate measures are far from ideal, and that they would tend to underestimate the underlying true specific association if this was with an associated constituent.

An important justification for this review is that major ecological differences between countries and within countries and also secular trends in vascular disease are inadequately explained by differences in established risk factors.<sup>58</sup> The justification for our 'exposure based' approach, is not that it can point directly to underlying causes but rather that it can help to mark out the territory in which the search for new causes is most likely to be profitable.

For coronary heart disease, roughly equal numbers of studies reported a negative association as reported null. This apparently unimpressive result needs to be interpreted in the light of similar findings for more favoured hypotheses. Willet, in his review of the epidemiological evidence in favour of the classic diet heart hypothesis,<sup>3</sup> found a positive association with saturated fat intake in only two of the 12 cohort studies reviewed, a positive association with cholesterol intake in two and a negative relationship with polyunsaturated fat in one. Though we have made no formal attempt to gauge study quality, the single most informative study on fruit and vegetables and coronary heart disease to date is that reported by Knekt *et al.*<sup>41</sup> because of its combination of dietary history measure (with better validity than food frequency questionnaires and 24-h recalls) and a large person-time of follow up (5000 subjects followed for 14 years). This found a negative association with coronary death for both fruit and vegetables. In the studies we have reviewed, significant

TABLE 9 Summary of studies reporting measures of association between intake of fruit and vegetables and stroke

| Study type               | Study population(s)                                     | Association with food | Association with proxy <sup>b</sup> |
|--------------------------|---------------------------------------------------------|-----------------------|-------------------------------------|
| Ecological               | 8 regions of England and Wales <sup>17</sup>            | –                     | neg <sup>a</sup>                    |
|                          | 19 countries <sup>19</sup>                              | pos                   | –                                   |
|                          | 16 regions of England, Wales and Scotland <sup>48</sup> | neg                   | –                                   |
|                          | 49 regions of Japan <sup>21</sup>                       | –                     | pos                                 |
|                          | 22 districts of Scotland <sup>49</sup>                  | neg                   | –                                   |
| Case control             | Nottingham <sup>50</sup>                                | –                     | null                                |
| Cohort                   | Norwegian postal survey <sup>31</sup>                   | –                     | neg                                 |
|                          | Japanese general population <sup>32</sup>               | null                  | –                                   |
|                          | Gothenburg women <sup>33</sup>                          | –                     | null                                |
|                          | Rancho Bernardo <sup>51</sup>                           | –                     | neg                                 |
|                          | Honolulu heart <sup>52</sup>                            | –                     | neg                                 |
|                          | US nurses <sup>53</sup>                                 | neg                   | –                                   |
|                          | UK elderly <sup>44</sup>                                | –                     | neg                                 |
| Framingham <sup>45</sup> | neg                                                     | –                     |                                     |

<sup>a</sup> Association neg = statistically significant negative association, pos = statistically significant positive association and null = no significant association. A negative association implies a protective effect.

<sup>b</sup> Proxy indicates that associations were only reported for nutrients – taken here as proxies for fruit and vegetables.

associations are not more common where study quality is poor.

There were fewer studies of stroke than of coronary heart disease; with the majority reporting a negative association. These protective associations contrast with the null association between blood cholesterol concentration and stroke risk (which is suggestive of a null association also with saturated fat intake) revealed by a recent meta-analysis.<sup>59</sup> The single most informative study on fruit and vegetables and stroke to date is that reported by Manson *et al.*<sup>53</sup> because of its combination of food frequency questionnaire (better able to characterize usual intake than 24-h recall) and large person-time of follow up (87 000 nurses for 8 years). This reported a negative association between stroke incidence and vegetables but was null for fruit.

The observed protective association for fruit and vegetables and cardiovascular disease may be explained by confounding. This may be because high intake of fruit and vegetables is associated with other healthy behaviours<sup>60</sup> or because high intake of fruits and vegetables are associated with reduced intake of putative harmful substances such as salt or saturated fat. We found very few studies that adequately addressed the issue of confounding and cannot discount this as an explanation, at least in part, for the observed association.

A number of mechanistic hypotheses invoking specific constituents of fruits and vegetables have been proposed. The antioxidant hypothesis<sup>8</sup> suggests antioxidant vitamins such as C and E,  $\beta$ -carotene and other

carotenoids; antioxidant minerals such as selenium and zinc and other antioxidant compounds such as flavonoids are protective. The homocysteine hypothesis<sup>7</sup> suggests substances such as folate and vitamins B6 and B12 that modify blood levels of homocysteine are protective. The tendency of researchers to pursue hypotheses based on single nutrients, may underestimate the possibilities with exposures as chemically complex as foods. The fate, so far, of the  $\beta$ -carotene and  $\alpha$ -tocopherol hypotheses may be instructive.<sup>61,62</sup>

The current literature did not allow us to examine the association of cardiovascular risk with specific fruits and vegetables or with fruit and vegetable groups, or to examine the effect of seasonal deficits in intake; nor could we examine the effects of secular changes in diet.

Those conducting epidemiological studies of diet and vascular disease should be encouraged to formulate and test hypotheses in terms of foods as well as specific food constituents (whether nutrients or non-nutrients). Standard food groups would help such analyses. International collaboration for food based analyses of existing cohort studies, where the data is available, could help refine the current state of knowledge.

The public health importance of international differences in cardiovascular mortality is highlighted by the recent work of Peto<sup>63</sup> which suggests that, once the effect of smoking is removed, populations differ little in their overall cancer death rates but continue to differ considerably in their rates of vascular mortality. Results from the WHO MONICA study<sup>58</sup> show that these interpopulation differences are very inadequately

explained by the conventional risk factors—suggesting that the search for new determinants of vascular risk should be continued.

#### ACKNOWLEDGEMENTS

Dr Ness is supported by a Wellcome Research Training Fellowship in Clinical Epidemiology.

#### REFERENCES

- <sup>1</sup> *Coronary Heart Disease. An Epidemiological Overview*. Central Health Monitoring Unit Overview series. London: HMSO, 1994.
- <sup>2</sup> *Stroke. An Epidemiological Overview*. Central Health Monitoring Unit Overview series. London: HMSO, 1994.
- <sup>3</sup> Willett W. *Nutritional Epidemiology*. New York: Oxford University Press, 1990.
- <sup>4</sup> Report of the Cardiovascular Review Group Committee on Medical Aspects of Food Policy. *Nutritional Aspects of Cardiovascular Disease*. London: HMSO, 1994.
- <sup>5</sup> James W P T, Duthie G G, Wahle K W J. The Mediterranean diet: protective or simply non-toxic? *Eur J Clin Nutr* 1989; **43** (Suppl. 2): 31–41.
- <sup>6</sup> Steinmetz K A, Potter J D. Vegetables, fruit, and cancer. I. Epidemiology. *Cancer Causes Control* 1991; **2**: 325–57.
- <sup>7</sup> Boushey C J, Beresford S A A, Omenn G S, Motulsky A G. A quantitative assessment of plasma homocysteine as a risk factor for vascular disease: probable benefits of increasing folic acid intakes. *JAMA* 1995; **274**: 1049–57.
- <sup>8</sup> Wiztum J L. The oxidation hypothesis of atherosclerosis. *Lancet* 1994; **344**: 793–95.
- <sup>9</sup> James W P T in collaboration with Ferro-Luzzi A, Isakson B, Szostak W B. *Healthy Nutrition: Preventing Nutrition-related Diseases in Europe*. Copenhagen: WHO Regional publications, European Series, No. 24, 1988.
- <sup>10</sup> Committee on Diet and Health. *Diet and Health: Implications for Reducing Chronic Disease Risk*. Washington DC: National Academy Press, 1989.
- <sup>11</sup> Report of WHO Study Group. *Diet, Nutrition, and the Prevention of Chronic Diseases*. Technical Report Series 797. Geneva: World Health Organization, 1990.
- <sup>12</sup> Powles J W, Ruth D. Diet-mortality associations: an overview. In: Wahlqvist M L, Vobecky J S (eds). *Medical Practice of Preventive Nutrition*. London: Smith Gordon, 1992.
- <sup>13</sup> Marmot M, Elliott P. *Coronary Heart Disease Epidemiology: From Aetiology to Public Health*. Oxford: Oxford University Press, 1992.
- <sup>14</sup> Marmot M G, Poulter N R. *The Prevention of Stroke in Stroke Octet*. London: The Lancet, 1992.
- <sup>15</sup> Klag M J, Whelton P K. The decline in stroke mortality: an epidemiologic perspective. *Ann Epidemiol* 1993; **3**: 571–55.
- <sup>16</sup> Bronner L L, Kanter D S, Manson J E. Primary prevention of stroke. *N Engl J Med* 1995; **333**: 1392–1400.
- <sup>17</sup> Knox E G. Ischaemic heart disease mortality and dietary intake of calcium. *Lancet* 1973; **i**: 1465–67.
- <sup>18</sup> Armstrong B K, Mann J I, Adelstein A M, Eskin F. Commodity consumption and ischaemic heart disease mortality, with special reference to dietary practices. *J Chron Dis* 1975; **28**: 455–69.
- <sup>19</sup> Knox E G. Foods and diseases. *Br J Prev Soc Med* 1977; **31**: 71–80.
- <sup>20</sup> Byington R, Dyer A R, Garside D *et al*. Recent trends of major coronary risk factors and CHD mortality in the United States and other industrialised countries. In: Proceedings of the Conference on the decline of coronary heart disease mortality. Washington: NIH publication No 79-1610., US Department of Health, 1979.
- <sup>21</sup> Ikeda M, Kasahara M, Koizumi A, Watanabe T. Correlation of cerebrovascular disease standardised mortality ratios with dietary sodium and the sodium/potassium ratio among the Japanese population. *Prev Med* 1986; **15**: 46–59.
- <sup>22</sup> Crombie I K, Smith W C S, Tavendale R, Tunstall-Pedoe H. Geographical clustering of risk factors for coronary heart disease in the Scottish Heart Health Study. *Br Heart J* 1990; **64**: 199–203.
- <sup>23</sup> Artaud-Wild S M, Connor S L, Sexton G, Connor W E. Differences in coronary mortality can be explained by differences in cholesterol and saturated fat intakes in 40 countries but not in France and Finland: A paradox. *Circulation* 1993; **88**: 2771–79.
- <sup>24</sup> Bellizzi M C, Franklin M F, Duthie G G, James W P T. Vitamin E and coronary heart disease: The European paradox. *Eur J Clin Nutr* 1994; **48**: 822–31.
- <sup>25</sup> Criqui M H, Ringel B L. Does diet or alcohol explain the French paradox. *Lancet* 1994; **344**: 1719–23.
- <sup>26</sup> Sinha D P. Changing patterns of food, nutrition and health in the Caribbean. *Nutr Res* 1995; **15**: 899–938.
- <sup>27</sup> Gramenzi A, Gentile A, Fasoli M, Negri E, Parazzini F, La Vecchia C. Association between certain foods and risk of myocardial infarction in women. *Br Med J* 1990; **300**: 771–73.
- <sup>28</sup> Tzonou A, Kalandidi A, Trichopoulou A *et al*. Diet and coronary heart disease: a case-control study in Athens, Greece. *Epidemiology* 1993; **4**: 511–16.
- <sup>29</sup> Georgieva L M, Powles J, Ness A R, Penev B, Dragoichev T, Popova S. Negative association of fruit and vegetable consumption with ischaemic heart disease: a case control study from Sofia, Bulgaria. Poster at conference: IEA regional meeting in The Hague in August 1995.
- <sup>30</sup> Morris J N, Marr J W, Clayton D G. Diet and heart: a postscript. *Br Med J* 1977; **2**: 308–14.
- <sup>31</sup> Vollset S E, Bjelke E. Does consumption of fruit and vegetables protect against stroke? *Lancet* 1983; **ii**: 742.
- <sup>32</sup> Hirayama T. Nutrition and cancer — a large scale cohort study. *Prog Clin Biol Res* 1986; **206**: 299–311.
- <sup>33</sup> Lapidus L, Anderson H, Bengtsson C, Bosaeus I. Dietary habits in relation to incidence of cardiovascular disease and death in women: a 12-year follow-up of participants in the population study of women in Gothenburg, Sweden. *Am J Clin Nutr* 1986; **44**: 444–48.
- <sup>34</sup> Khaw K-T, Barrett-Connor E. Dietary fibre and reduced ischaemic heart disease mortality rates in men and women: a 12-year prospective study. *Am J Epidemiol* 1987; **126**: 1093–102.
- <sup>35</sup> Fraser G E, Sabate J, Beeson W L, Stahan T M. A possible protective effect of nut consumption on risk of coronary heart disease: the Adventist health study. *Arch Intern Med* 1992; **152**: 1416–24.
- <sup>36</sup> Manson J E, Stampfer M J, Willett W *et al*. A prospective study of vitamin C and incidence of coronary heart disease in women. *Circulation* 1992; **85**: 865.
- <sup>37</sup> Fehily A M, Yarnell J W G, Sweetnam P M, Elwood P C. Diet and incident ischaemic heart disease. The Caerphilly Study. *Br J Nutr* 1993; **69**: 303–14.

- <sup>38</sup> Rimm E B, Stampfer M J, Ascherio A, Giovannucci E, Colditz G A, Willett W C. Vitamin E consumption and the risk of coronary heart disease in men. *N Engl J Med* 1993; **328**: 1450–56.
- <sup>39</sup> Rimm E, Ascherio A, Giovannucci E, Stampfer M, Willett W. Dietary fibre intake and coronary heart disease among a large population of US men. *Am J Epidemiol* 1995; **141** (Suppl.): S17.
- <sup>40</sup> Hertog M G L, Feskens E J M, Hollman P C H, Katan M B, Kromhout D. Dietary antioxidant flavonoids and risk of coronary heart disease: the Zutphen Elderly Study. *Lancet* 1993; **342**: 1007–11.
- <sup>41</sup> Knekt P, Reunanen A, Jarvinen R, Seppanen R, Hellovaara M, Aromaa A. Antioxidant vitamin intake and coronary mortality in a longitudinal study. *Am J Epidemiol* 1994; **139**: 180–89.
- <sup>42</sup> Knekt P, Jarvinen R, Reunanen A, Maatela J. Flavonoid intake and coronary mortality in Finland: a cohort study. *Br Med J* 1996; **312**: 478–81.
- <sup>43</sup> Gaziano J M, Manson J E, Branch L G, Colditz G A, Willett W C, Buring J E. A prospective study of consumption of carotenoids in fruits and vegetables and decreased cardiovascular mortality in the elderly. *Ann Epidemiol* 1995; **5**: 255–60.
- <sup>44</sup> Gale C R, Martyn C N, Winter P, Cooper C. Vitamin C and risk of death from stroke and coronary heart disease in a cohort of elderly people. *Br Med J* 1995; **310**: 1563–66.
- <sup>45</sup> Gillman M W, Cupples L A, Gagnon D *et al*. Protective effect of fruits and vegetables on development of stroke in men. *JAMA* 1995; **273**: 1113–17.
- <sup>46</sup> Pandey D K, Shekelle R, Selwyn B J, Tangney C, Stamler J. Dietary vitamin C and  $\beta$ -carotene and risk of death in middle-aged men: The Western Electric study. *Am J Epidemiol* 1995; **142**: 1269–78.
- <sup>47</sup> Kushi L H, Folsom A R, Prinaes R J, Mink P J, Ying W, Bostick R M. Dietary antioxidant vitamins and death from coronary heart disease in postmenopausal women. *N Engl J Med* 1996; **334**: 1156–62.
- <sup>48</sup> Acheson R M, Williams D R R. Does consumption of fresh fruit and vegetables protect against stroke? *Lancet* 1983; **i**: 1191–93.
- <sup>49</sup> Starr J M, Thomas B, Whalley L J. Population risk factors for hospitalisation for stroke in Scotland. *Int J Epidemiol* 1996; **25**: 276–81.
- <sup>50</sup> Barer D, Leibowitz R, Ebrahim S, Pengally D, Neale R. Vitamin C status and other nutritional indices in patients with stroke and other acute illnesses: a case-control study. *J Clin Epidemiol* 1989; **42**: 625–31.
- <sup>51</sup> Khaw K-T, Barrett-Connor E B. Dietary potassium and stroke-associated mortality: a 12-year prospective population study. *N Engl J Med* 1987; **316**: 235–40.
- <sup>52</sup> Lee C N, Reed D M, MacLean C J, Yano K, Chiu D. Dietary potassium and stroke. *N Engl J Med* 1988; **318**: 995–96.
- <sup>53</sup> Manson J E, Willett W C, Stampfer M J, Colditz G A, Speizer F E, Hennekens C H. Vegetable and fruit consumption and incidence of stroke in women. *Circulation* 1994; **89**: 932 (Abstract).
- <sup>54</sup> Enstrom J E, Kanim L E, Klein M A. Vitamin C intake and mortality among a sample of the United States population. *Epidemiology* 1992; **3**: 194–202.
- <sup>55</sup> Rinzler S H. Primary prevention of coronary heart disease by diet. *Bull N Y Acad Med* 1968; **44**: 936–49.
- <sup>56</sup> Singh R B, Rastogi S S, Verma R *et al*. Randomised controlled trial of cardioprotective diet in patients with recent acute myocardial infarction: results of one year follow-up. *Br Med J* 1992; **304**: 1015–19.
- <sup>57</sup> de Lorgeril M, Renauld S, Mamelle N *et al*. Mediterranean alpha-linolenic acid-rich diet in secondary prevention of coronary heart disease. *Lancet* 1994; **343**: 1454–59.
- <sup>58</sup> WHO MONICA project. Ecological analysis of the association between mortality and major risk factors of cardiovascular disease. *Int J Epidemiol* 1994; **23**: 505–16.
- <sup>59</sup> Prospective studies collaboration. Cholesterol, diastolic blood pressure, and stroke: 13 000 strokes in 450 000 people in 45 prospective cohorts. *Lancet* 1995; **346**: 1647–53.
- <sup>60</sup> Serdula M K, Byers T, Mokdad A H, Simoes E, Mendlein J M, Coates R J. The association between fruit and vegetable intake and chronic disease risk factors. *Epidemiology* 1996; **7**: 161–65.
- <sup>61</sup> Rowe P M. Beta-carotene takes a collective beating. *Lancet* 1996; **347**: 249.
- <sup>62</sup> Greenberg E R, Sporn M B. Antioxidant vitamins, cancer, and cardiovascular disease. *N Engl J Med* 1996; **334**: 1189–90.
- <sup>63</sup> Peto R, Lopez A D, Boreham J, Thun M, Heath C Jr. Mortality from smoking in developed countries 1950–2000. Oxford: Oxford University Press, 1994.

(Revised version received June 1996)
